# Supplementary material for: Effect of substitution on the charge transport properties of oligophenylenethiolate self-assembled monolayers
Source: Royal Society of Chemistry journal article supplement (doi:10.1039/d2cp04193f), 2022-01-01
Supplement: d2cp04193f1.pdf [file d2cp04193f1.pdf]

## **Electronic supplementary information**

### **Effect of substitution on the charge transport properties of oligophenylenethiolate self-assembled monolayers**

Yangbiao Liu,<sup>1</sup> Sonja Katzbach,<sup>2</sup> Andika Asyuda,<sup>1</sup> Saunak Das,<sup>1</sup>  
Andreas Terfort,<sup>2</sup> and Michael Zharnikov<sup>1,\*</sup>

<sup>1</sup> *Angewandte Physikalische Chemie, Universität Heidelberg, Im Neuenheimer Feld 253,  
D-69120 Heidelberg, Germany*

<sup>2</sup> *Institut für Anorganische und Analytische Chemie, Johann Wolfgang Goethe Universität  
Frankfurt, Max-von-Laue-Straße 7, D-60438 Frankfurt am Main, Germany*

## 1. Additional SECO Data: R-PT SAMs

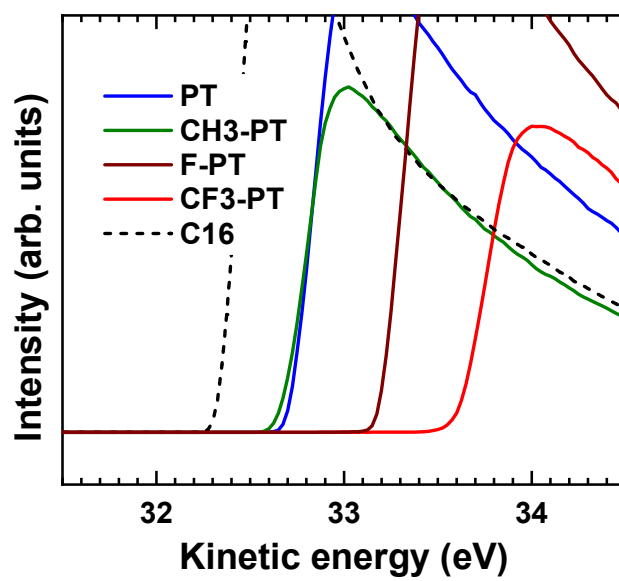

**Figure S1.** SECO spectra of the R-PT SAMs and the reference C16 monolayer.

## 2. Charge Transport Data: H-nPT SAMs

**Table S1.** Overview of the charge transport measurements for the Au/H-nPT//Ga<sub>2</sub>O<sub>3</sub>/EGaIn junctions.

| <b>SAM</b> | <b>Samples</b> | <b>Junctions</b> | <b>Scans</b> | <b>Processed</b> | <b>Yield</b> |
|------------|----------------|------------------|--------------|------------------|--------------|
| H-PT       | 5              | 29               | 381          | 233              | 61.2%        |
| H-BPT      | 4              | 25               | 283          | 199              | 70.3%        |
| H-TPT      | 3              | 23               | 317          | 241              | 76.0%        |

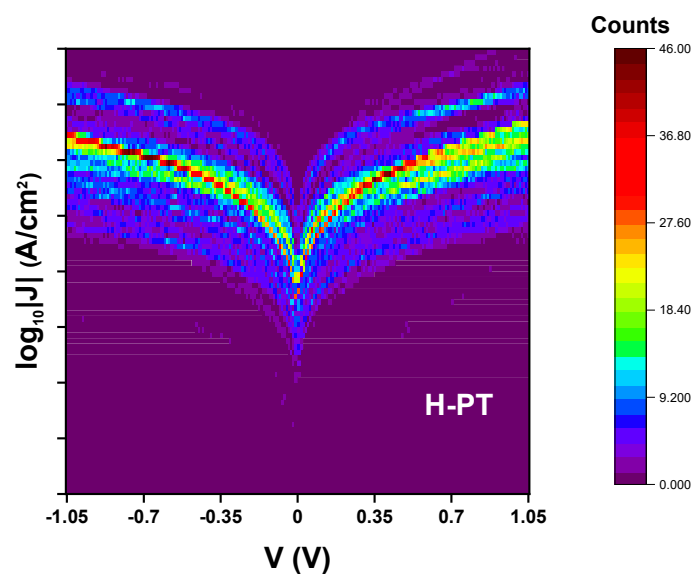

**Figure S2.** Electrical characteristics of the Au/H-PT//Ga<sub>2</sub>O<sub>3</sub>/EGaIn junction: Heat map of the semi- $\log_{10} |J(V)|$  curves.

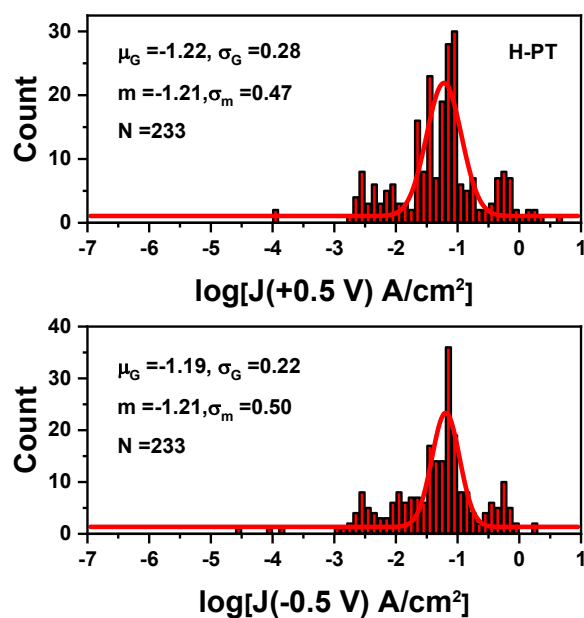

**Figure S3.** Electrical characteristics of the Au/H-PT//Ga<sub>2</sub>O<sub>3</sub>/EGaIn junction: Histograms of the  $\log_{10} |J|$  at  $V = +0.5$  V (top panel) and  $V = -0.5$  V (bottom panel). The characteristic parameters are given:  $\mu_G$  – Gaussian average;  $\sigma_G$  – Gaussian standard deviation;  $m$  – median average;  $\sigma_m$  - adjusted median absolute deviation; and  $N$  – number of scans.

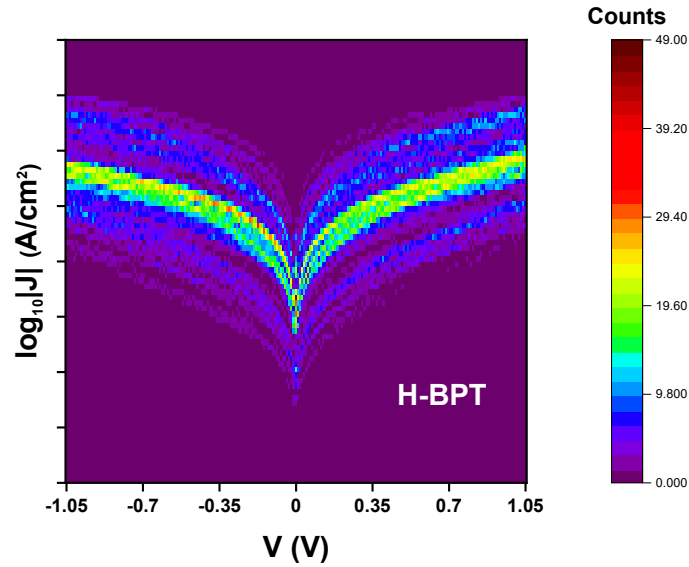

**Figure S4.** Electrical characteristics of the Au/H-BPT//Ga<sub>2</sub>O<sub>3</sub>/EGaIn junction: Heat map of the semi- $\log_{10} |J(V)|$  curves.

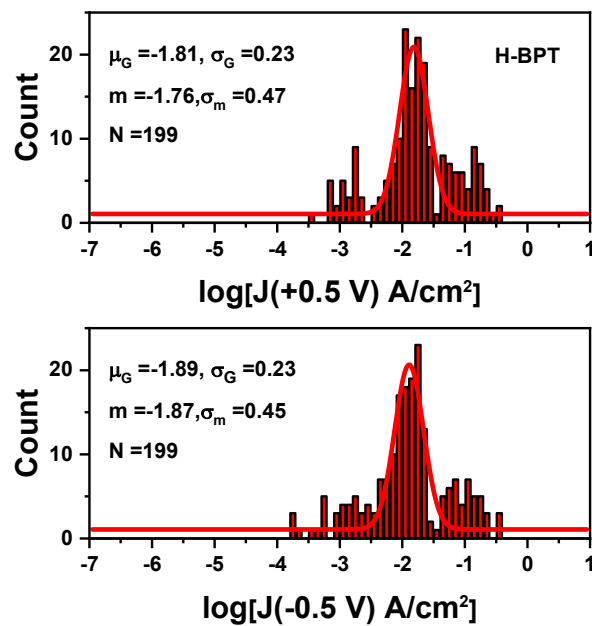

**Figure S5.** Electrical characteristics of the Au/H-BPT//Ga<sub>2</sub>O<sub>3</sub>/EGaIn junction: Histograms of the  $\log_{10} |J|$  at  $V = +0.5$  V (top panel) and  $V = -0.5$  V (bottom panel). The characteristic parameters are given:  $\mu_G$  – Gaussian average;  $\sigma_G$  – Gaussian standard deviation;  $m$  – median average;  $\sigma_m$  - adjusted median absolute deviation; and  $N$  – number of scans.

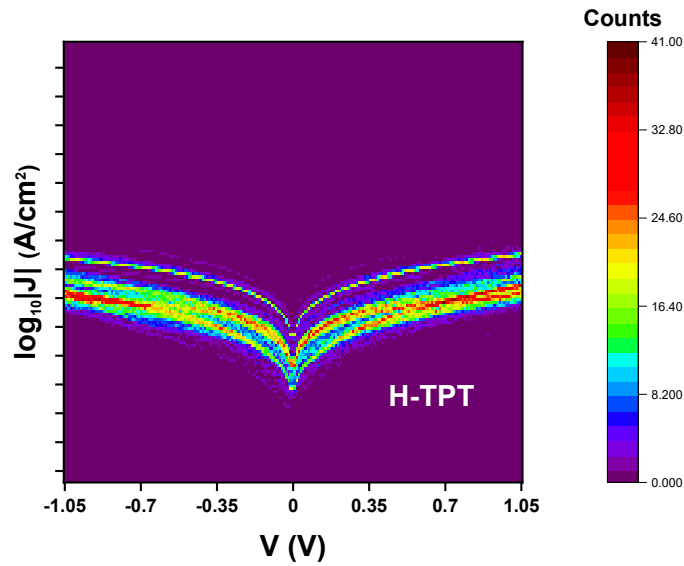

**Figure S6.** Electrical characteristics of the Au/H-TPT//Ga<sub>2</sub>O<sub>3</sub>/EGaIn junction: Heat map of the semi- $\log_{10} |J(V)|$  curves.

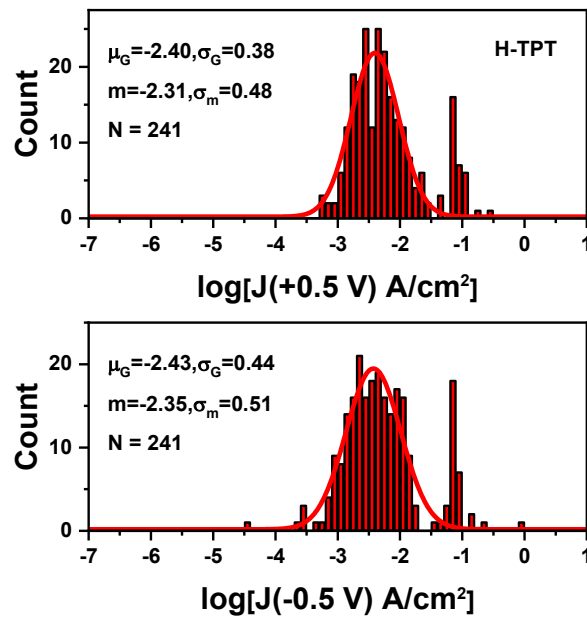

**Figure S7.** Electrical characteristics of the Au/H-TPT//Ga<sub>2</sub>O<sub>3</sub>/EGaIn junction: Histograms of the  $\log_{10} |J|$  at  $V = +0.5$  V (top panel) and  $V = -0.5$  V (bottom panel). The characteristic parameters are given:  $\mu_G$  – Gaussian average;  $\sigma_G$  – Gaussian standard deviation;  $m$  – median average;  $\sigma_m$  - adjusted median absolute deviation; and  $N$  – number of scans.

### 3. Charge Transport Data: F-nPT SAMs

**Table S2.** Overview of the charge transport measurements for the Au/F-nPT//Ga<sub>2</sub>O<sub>3</sub>/EGaIn junctions.

| <b>SAM</b> | <b>Samples</b> | <b>Junctions</b> | <b>Scans</b> | <b>Processed</b> | <b>Yield</b> |
|------------|----------------|------------------|--------------|------------------|--------------|
| F-PT       | 4              | 25               | 430          | 291              | 67.7%        |
| F-BPT      | 3              | 24               | 232          | 157              | 67.7%        |
| F-TPT      | 4              | 17               | 243          | 153              | 63.0%        |

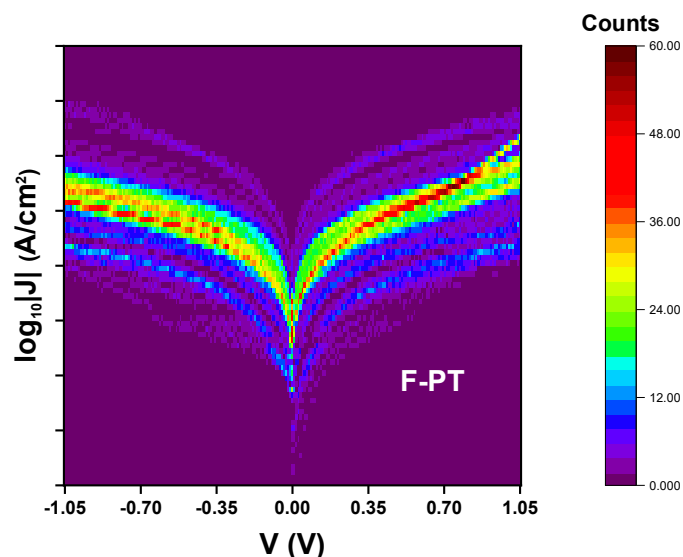

**Figure S8.** Electrical characteristics of the Au/F-PT//Ga<sub>2</sub>O<sub>3</sub>/EGaIn junction: Heat map of the semi- $\log_{10}|J(V)|$  curves.

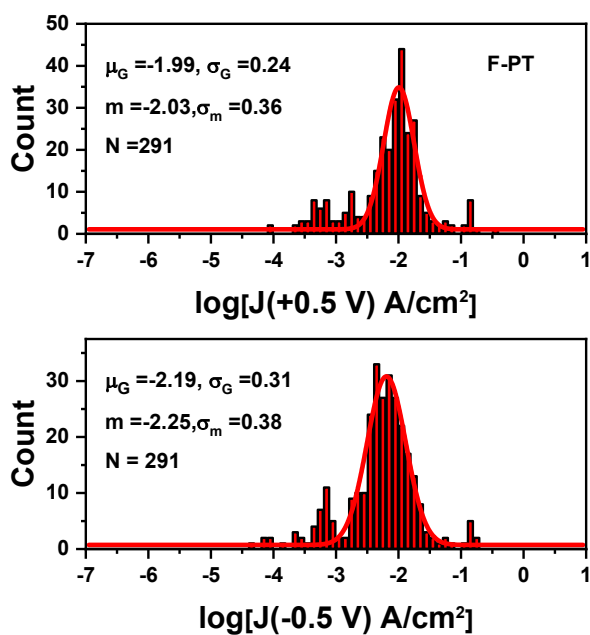

**Figure S9.** Electrical characteristics of the Au/F-PT//Ga<sub>2</sub>O<sub>3</sub>/EGaIn junction: Histograms of the  $\log_{10}|J|$  at  $V = +0.5$  V (top panel) and  $V = -0.5$  V (bottom panel). The characteristic parameters are given:  $\mu_G$  – Gaussian average;  $\sigma_G$  – Gaussian standard deviation;  $m$  – median average;  $\sigma_m$  - adjusted median absolute deviation; and  $N$  – number of scans.



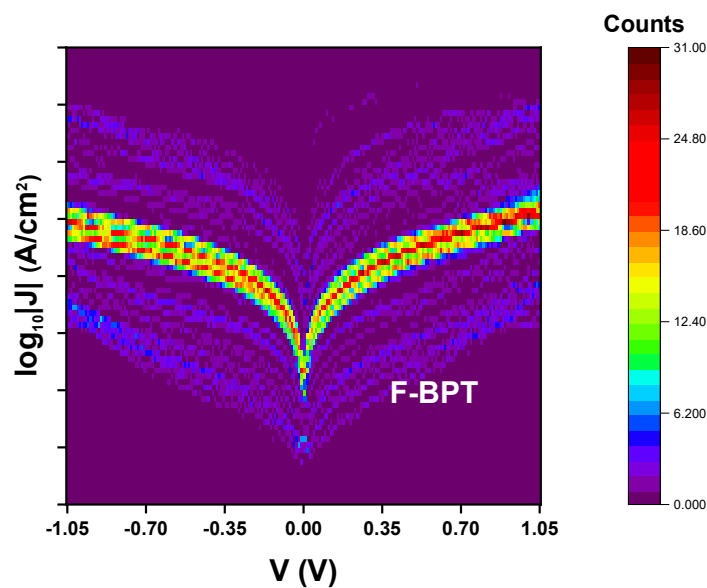

**Figure S10.** Electrical characteristics of the Au/F-BPT//Ga<sub>2</sub>O<sub>3</sub>/EGaIn junction: Heat map of the semi-log<sub>10</sub> |J(V)| curves.

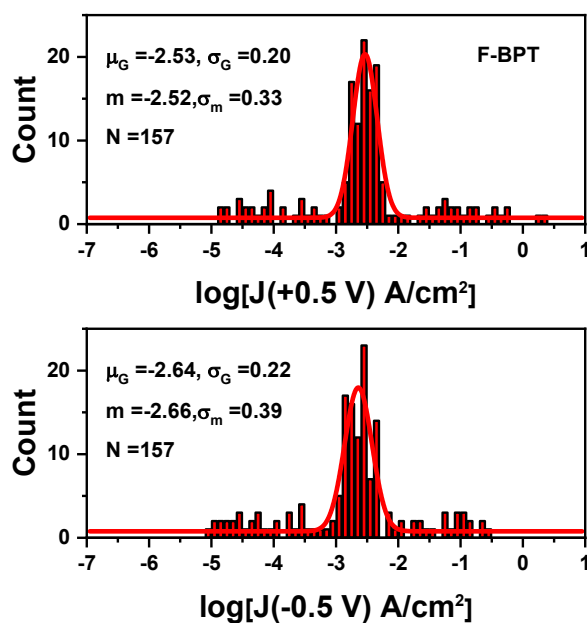

**Figure S11.** Electrical characteristics of the Au/F-BPT//Ga<sub>2</sub>O<sub>3</sub>/EGaIn junction: Histograms of the log<sub>10</sub> |J| at V = +0.5 V (top panel) and V = -0.5 V (bottom panel). The characteristic parameters are given:  $\mu_G$  – Gaussian average;  $\sigma_G$  – Gaussian standard deviation; m – median average;  $\sigma_m$  - adjusted median absolute deviation; and N – number of scans.

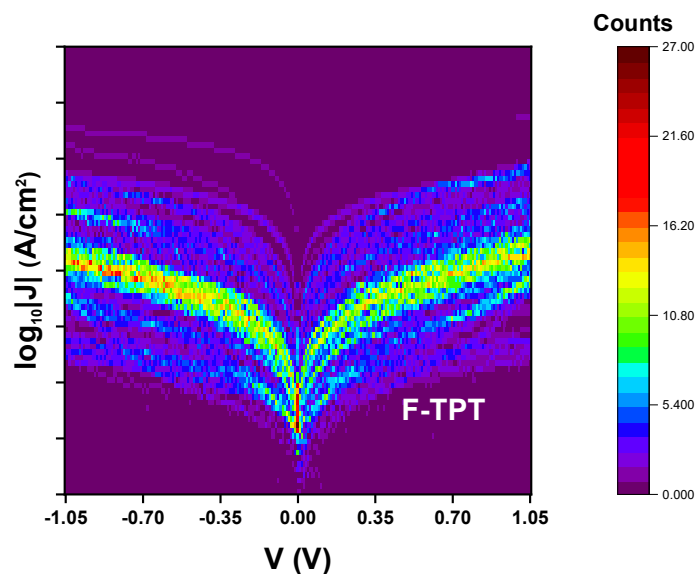

**Figure S12.** Electrical characteristics of the Au/F-TPT//Ga<sub>2</sub>O<sub>3</sub>/EGaIn junction: Heat map of the semi- $\log_{10} |J(V)|$  curves.

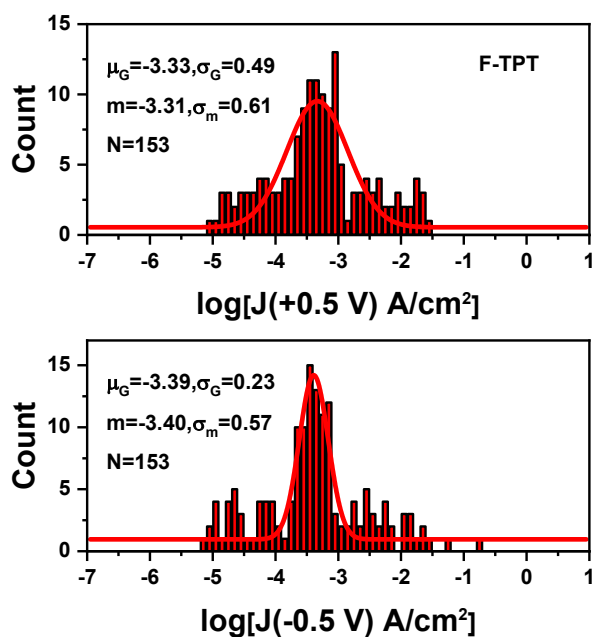

**Figure S13.** Electrical characteristics of the Au/F-TPT//Ga<sub>2</sub>O<sub>3</sub>/EGaIn junction: Histograms of the  $\log_{10} |J|$  at  $V = +0.5$  V (top panel) and  $V = -0.5$  V (bottom panel). The characteristic parameters are given:  $\mu_G$  – Gaussian average;  $\sigma_G$  – Gaussian standard deviation;  $m$  – median average;  $\sigma_m$  – adjusted median absolute deviation; and  $N$  – number of scans.

#### 4. Charge Transport Data: CH<sub>3</sub>-nPT SAMs

**Table S3.** Overview of the charge transport measurements for the Au/CH<sub>3</sub>-nPT//Ga<sub>2</sub>O<sub>3</sub>/EGaIn junctions.

| <b>SAM</b>           | <b>Samples</b> | <b>Junctions</b> | <b>Scans</b> | <b>Processed</b> | <b>Yield</b> |
|----------------------|----------------|------------------|--------------|------------------|--------------|
| CH <sub>3</sub> -PT  | 3              | 30               | 254          | 160              | 63.0%        |
| CH <sub>3</sub> -BPT | 2              | 16               | 241          | 146              | 60.6%        |
| CH <sub>3</sub> -TPT | 3              | 17               | 292          | 184              | 63.0%        |

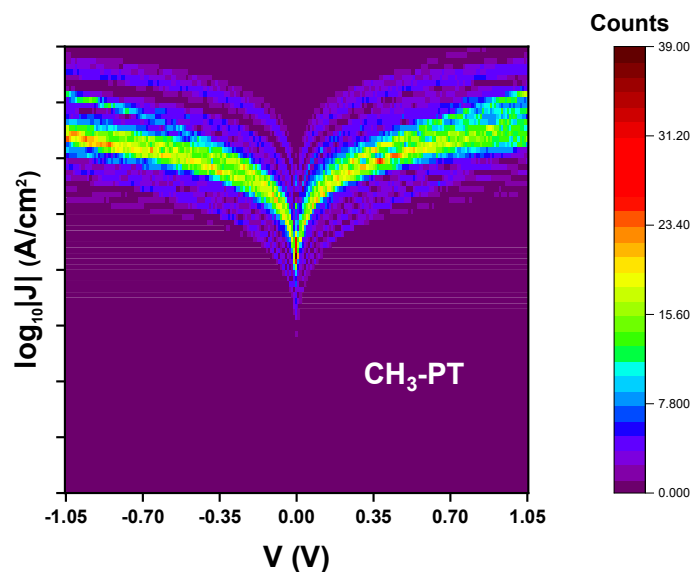

**Figure S14.** Electrical characteristics of the Au/CH<sub>3</sub>-PT//Ga<sub>2</sub>O<sub>3</sub>/EGaIn junction: Heat map of the semi-log<sub>10</sub> |J(V)| curves.

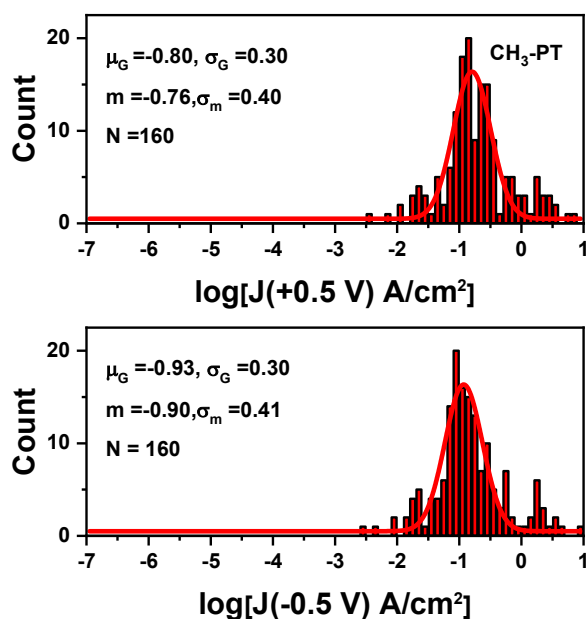

**Figure S15.** Electrical characteristics of the Au/CH<sub>3</sub>-PT//Ga<sub>2</sub>O<sub>3</sub>/EGaIn junction: Histograms of the log<sub>10</sub> |J| at V = +0.5 V (top panel) and V = -0.5 V (bottom panel). The characteristic parameters are given:  $\mu_G$  – Gaussian average;  $\sigma_G$  – Gaussian standard deviation; m – median average;  $\sigma_m$  - adjusted median absolute deviation; and N – number of scans.

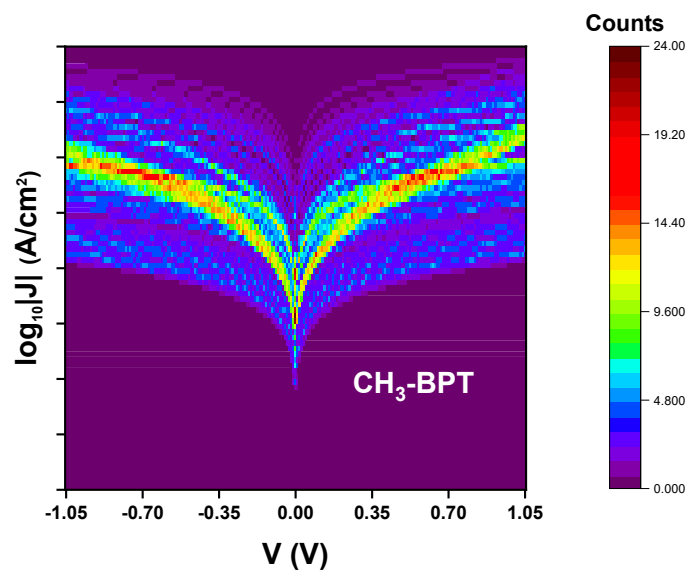

**Figure S16.** Electrical characteristics of the Au/CH<sub>3</sub>-BPT//Ga<sub>2</sub>O<sub>3</sub>/EGaIn junction: Heat map of the semi- $\log_{10} |J(V)|$  curves.

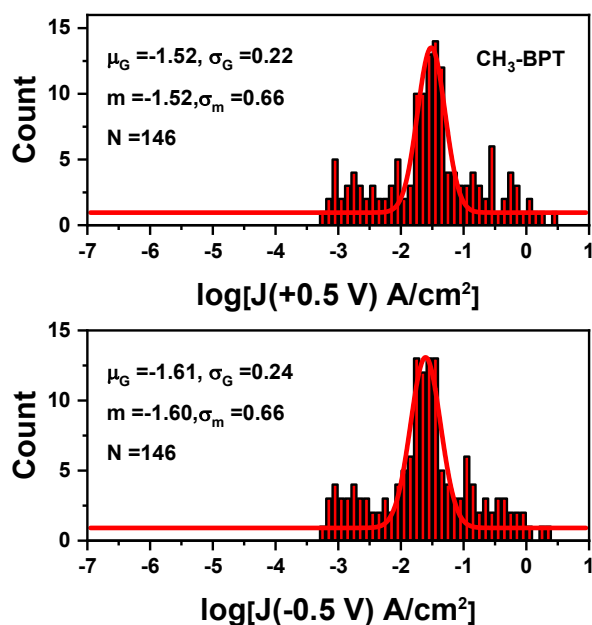

**Figure S17.** Electrical characteristics of the Au/CH<sub>3</sub>-BPT//Ga<sub>2</sub>O<sub>3</sub>/EGaIn junction: Histograms of the  $\log_{10} |J|$  at  $V = +0.5$  V (top panel) and  $V = -0.5$  V (bottom panel). The characteristic parameters are given:  $\mu_G$  – Gaussian average;  $\sigma_G$  – Gaussian standard deviation;  $m$  – median average;  $\sigma_m$  – adjusted median absolute deviation; and  $N$  – number of scans.

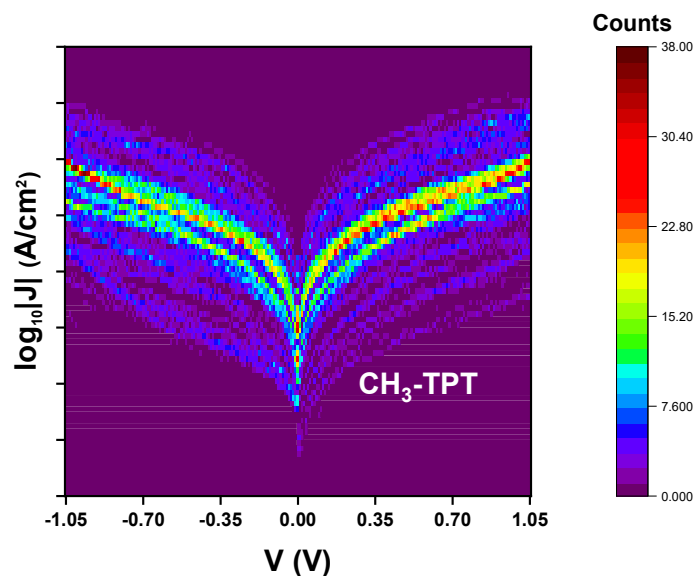

**Figure S18.** Electrical characteristics of the Au/CH<sub>3</sub>-TPT//Ga<sub>2</sub>O<sub>3</sub>/EGaIn junction: Heat map of the semi- $\log_{10} |J(V)|$  curves.

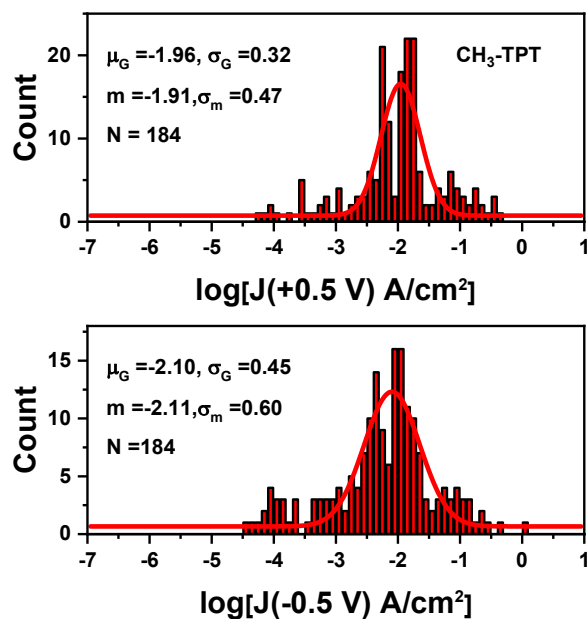

**Figure S19.** Electrical characteristics of the Au/CH<sub>3</sub>-TPT//Ga<sub>2</sub>O<sub>3</sub>/EGaIn junction: Histograms of the  $\log_{10} |J|$  at  $V = +0.5$  V (top panel) and  $V = -0.5$  V (bottom panel). The characteristic parameters are given:  $\mu_G$  – Gaussian average;  $\sigma_G$  – Gaussian standard deviation;  $m$  – median average;  $\sigma_m$  - adjusted median absolute deviation; and  $N$  – number of scans.

## 5. Charge Transport Data: CF<sub>3</sub>-nPT SAMs

**Table S4.** Overview of the charge transport measurements for the Au/CF<sub>3</sub>-nPT//Ga<sub>2</sub>O<sub>3</sub>/EGaIn junctions.

| <b>SAM</b> | <b>Samples</b> | <b>Junctions</b> | <b>Scans</b> | <b>Processed</b> | <b>Yield</b> |
|------------|----------------|------------------|--------------|------------------|--------------|
| CF3-PT     | 3              | 18               | 244          | 179              | 73.4%        |
| CF3-BPT    | 2              | 21               | 232          | 161              | 69.4%        |
| CF3-TPT    | 3              | 30               | 272          | 181              | 66.5%        |

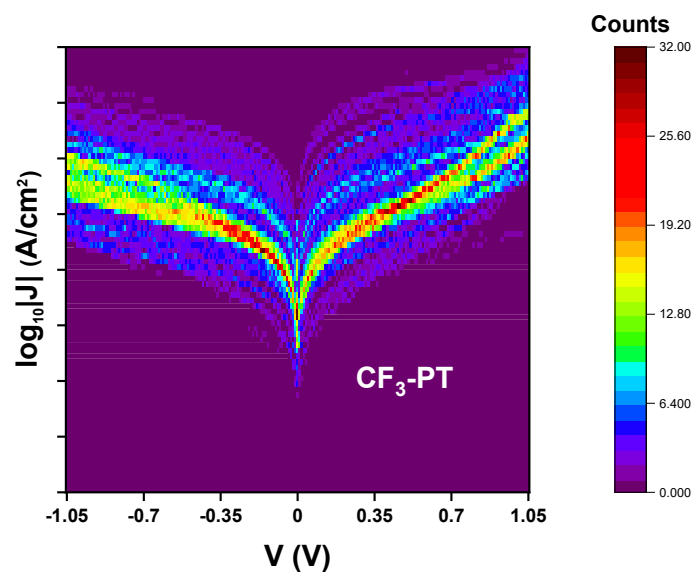

**Figure S20.** Electrical characteristics of the Au/CF<sub>3</sub>-PT//Ga<sub>2</sub>O<sub>3</sub>/EGaIn junction: Heat map of the semi-log<sub>10</sub> |J(V)| curves.

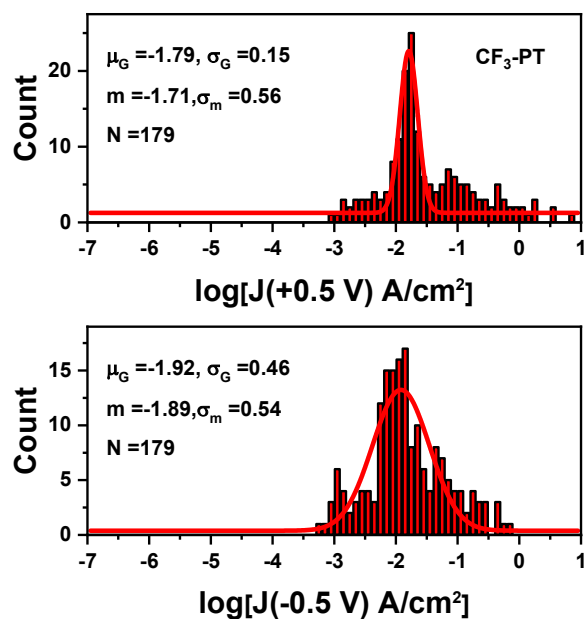

**Figure S21.** Electrical characteristics of the Au/CF<sub>3</sub>-PT//Ga<sub>2</sub>O<sub>3</sub>/EGaIn junction: Histograms of the log<sub>10</sub> |J| at V = +0.5 V (top panel) and V = -0.5 V (bottom panel). The characteristic parameters are given:  $\mu_G$  – Gaussian average;  $\sigma_G$  – Gaussian standard deviation; m – median average;  $\sigma_m$  – adjusted median absolute deviation; and N – number of scans.



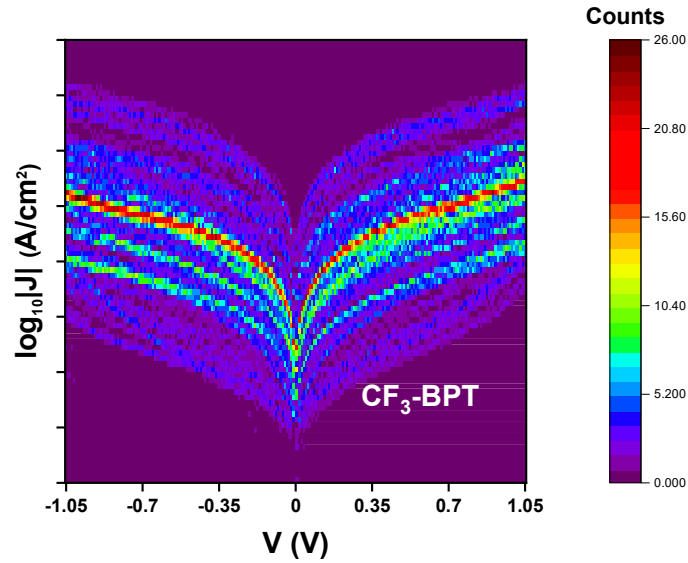

**Figure S22.** Electrical characteristics of the Au/CF<sub>3</sub>-BPT//Ga<sub>2</sub>O<sub>3</sub>/EGaIn junction: Heat map of the semi-log  $|J(V)|$  curves.

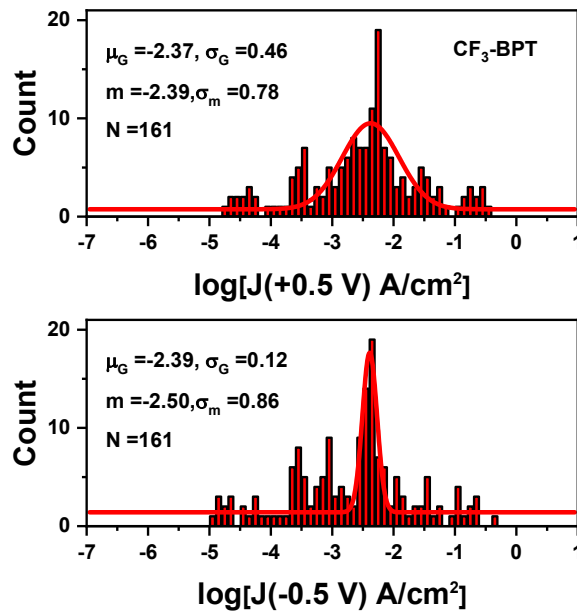

**Figure S23.** Electrical characteristics of the Au/CF<sub>3</sub>-BPT//Ga<sub>2</sub>O<sub>3</sub>/EGaIn junction: Histograms of the  $\log_{10}|J|$  at  $V = +0.5$  V (top panel) and  $V = -0.5$  V (bottom panel). The characteristic parameters are given:  $\mu_G$  – Gaussian average;  $\sigma_G$  – Gaussian standard deviation;  $m$  – median average;  $\sigma_m$  - adjusted median absolute deviation; and  $N$  – number of scans.

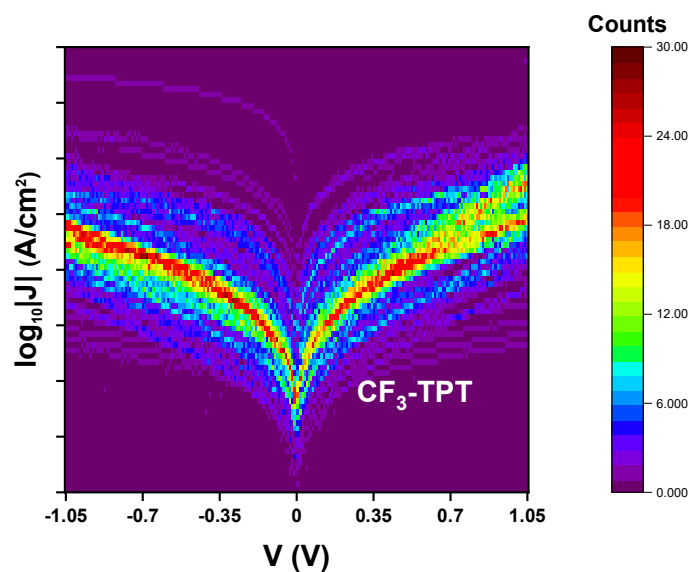

**Figure S24.** Electrical characteristics of the Au/CF<sub>3</sub>-TPT//Ga<sub>2</sub>O<sub>3</sub>/EGaIn junction: Heat map of the semi-log<sub>10</sub> |J(V)| curves.

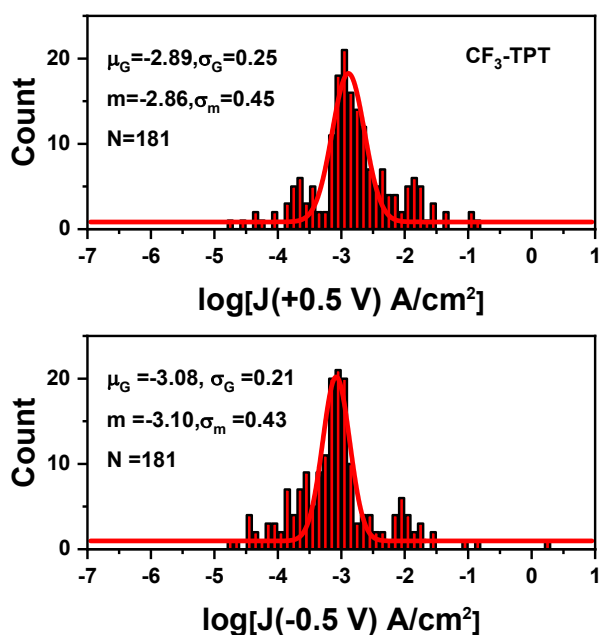

**Figure S25.** Electrical characteristics of the Au/CF<sub>3</sub>-TPT//Ga<sub>2</sub>O<sub>3</sub>/EGaIn junction: Histograms of the log<sub>10</sub> |J| at V = +0.5 V (top panel) and V = -0.5 V (bottom panel). The characteristic parameters are given:  $\mu_G$  – Gaussian average;  $\sigma_G$  – Gaussian standard deviation; m – median average;  $\sigma_m$  - adjusted median absolute deviation; and N – number of scans.

## 6. Rectification Ratio

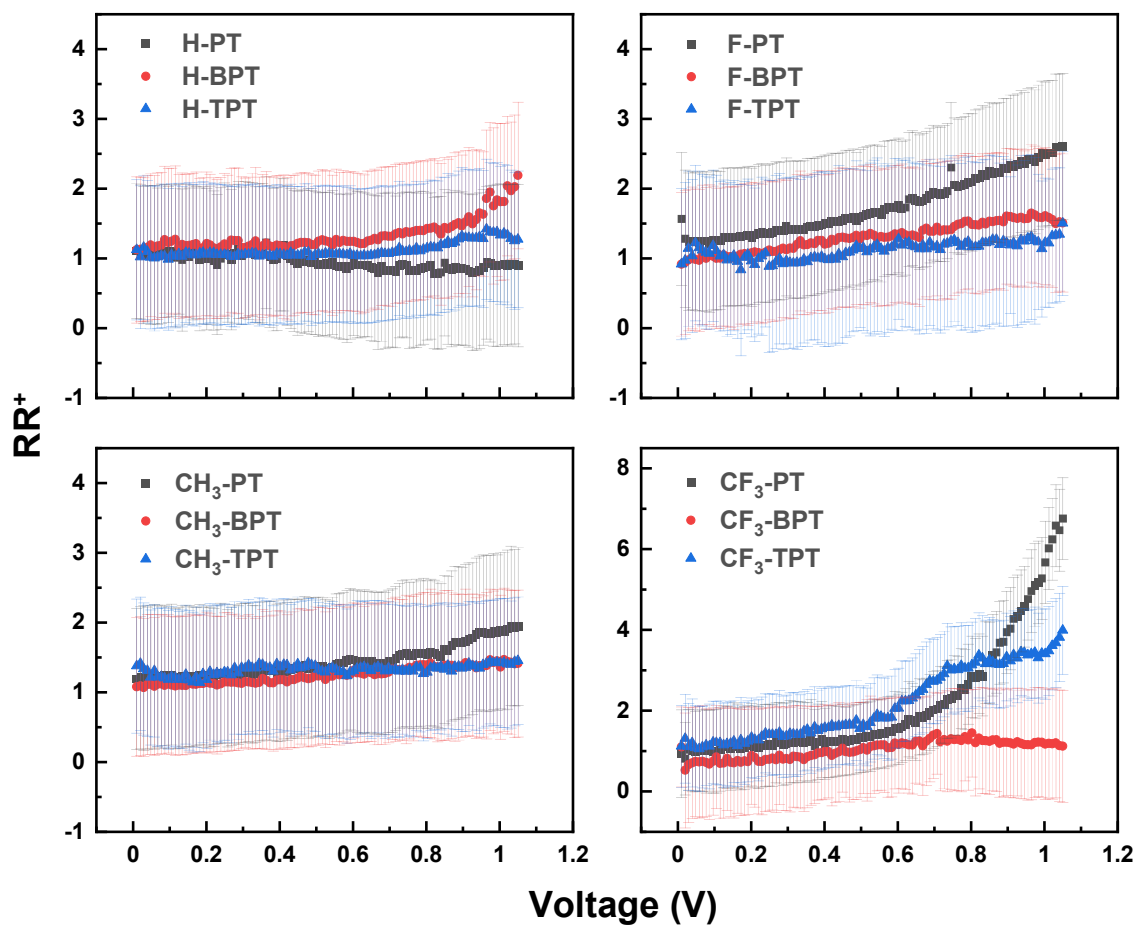

**Figure S26.** Rectification ratio of the R-nPT SAMs measured in the Au/SAM//Ga<sub>2</sub>O<sub>3</sub>/EGaIn junctions. The higher current density was observed at the positive bias voltages.
